# Supplementary material for: Endothelium-specific depletion of LRP1 improves glucose homeostasis through inducing osteocalcin
Source: PubMed Central journal article supplement (PMC8421392; doi:10.1038/s41467-021-25673-6), 2021-09-06
Supplement: 41467_2021_25673_MOESM1_ESM.pdf [file 41467_2021_25673_MOESM1_ESM.pdf]

**SUPPLEMENTARY INFORMATION**

**Supplementary Table 1. Representative genes that are regulated in ECs isolated from LRP1 eKO mice, analyzed with mRNA sequencing.**

| Gene Symbol       | Fold change (log2) |              |
|-------------------|--------------------|--------------|
|                   | MHLEC              | MLivEC       |
| <i>alox5ap</i>    | 2.15679311         | 1.938323017  |
| <i>ocn2</i>       | 4.60029667         | 6.087391462  |
| <i>ocn1 (ocn)</i> | 4.91337619         | 5.861306677  |
| <i>selplg</i>     | 3.67567119         | 1.872018864  |
| <i>timp4</i>      | -2.1184809         | -1.750636851 |
| <i>hmgcs2</i>     | -2.2955471         | -1.4651599   |
| <i>lrp1</i>       | -4.9463174         | -3.621346872 |

**Supplementary Table 2. Sequence information for qPCR primers**

| Gene                          | Forward primer             | Reverse primer               |
|-------------------------------|----------------------------|------------------------------|
| LRP1                          | 5'- ggaccaccatcgtgaaa-3'   | 5'-tcccagccacggtgatag-3      |
| Selplg                        | 5'- tctggcagtgtggactgg-3'  | 5'- caaggaagcttggggacat-3'   |
| Alox5ap                       | 5'- catgaaagcaaggcgcata-3' | 5'- cgcatctacgcagtcttg-3'    |
| OCN (recognizing both OCN1&2) | 5'- agactccggcgctacctt-3'  | 5'- ctcgtcacaagcagggttaag-3' |
| OCN1                          | 5'- cttggcccagacctag-3'    | 5'- gctgggcttggcatctg-3'     |
| OCN2                          | 5'- cttggtgcacacctag-3'    | 5'- gctgggcttggcatctg-3'     |
| HMGCS2                        | 5'- aggatgctccccaggtt-3'   | 5'- gactctagacgtttgggcaga-3' |
| Timp4                         | 5'- agggagagcctgaatcata-3' | 5'- gcaactgcatagcaagtgtg-3'  |
| GAPDH                         | 5'- tgtccgctggtgacctgac-3' | 5'- cctgctcaccaccttctg-3'    |

**Supplementary Table 3. Key resource table**

| REAGENT or RESOURCE                  | SOURCE         | IDENTIFIER    |
|--------------------------------------|----------------|---------------|
| <b>Antibodies</b>                    |                |               |
| LRP1-CTD, 1:1000                     | Sigma          | Cat#L2170     |
| LRP1 (8G1), 1:50                     | Abcam          | Cat#ab20384   |
| PECAM-1 (CD31), 1:1000               | BD Biosciences | Cat#553369    |
| Osteocalcin, 1:200                   | Santa Cruz     | Cat#sc-376726 |
| IRS-1, 1:500                         | Cell signaling | Cat#2382      |
| Phospho- IRS1 (Tyr612), 1:500        | Millipore      | Cat#09-432    |
| Akt, 1:1000                          | Cell signaling | Cat#9272      |
| phospho-Akt (Ser473), 1:1000         | Cell signaling | Cat#9271      |
| Phospho-Akt (Thr308) (D25E6), 1:1000 | Cell signaling | Cat#13038     |
| GSK-3β (D5C5Z), 1:1000               | Cell signaling | Cat#12456     |

|                                                                                                     |                      |                  |
|-----------------------------------------------------------------------------------------------------|----------------------|------------------|
| Phospho-GSK-3 $\beta$ (Ser9) (D85E12), 1:1000                                                       | Cell signaling       | Cat#5558         |
| Rabbit polyclonal anti-Glut4, 1:500                                                                 | EMD Millipore        | Cat#07-1404      |
| Phospho-IGFI Receptor $\beta$ (Tyr1135/1136)/Insulin Receptor $\beta$ (Tyr1150/1151) (19H7), 1:1000 | Cell signaling       | Cat#3024         |
| FOXO1, 1:1000                                                                                       | Cell signaling       | Cat#2880         |
| FOXO3A, 1:500                                                                                       | Thermo Scientific    | Cat#MA5-14932    |
| FOXO4, 1:1000                                                                                       | Cell signaling       | Cat#9472         |
| IGF1R (Ab-1161), 1:500                                                                              | Sigma-Aldrich        | Cat#SAB4300359   |
| GPRC6A, 1:500                                                                                       | Sigma-Aldrich        | Cat#SAB4500879   |
| V5 Epitope Tag Antibody, HRP conjugate, 1:1000                                                      | Thermo Scientific    | Cat#R960-25      |
| $\beta$ -Actin (C4) -HRP, 1:2000                                                                    | Santa Cruz           | Cat#sc-47778     |
| Anti-Flag antibody, 1:1000                                                                          | Sigma-Aldrich        | Cat#H7425        |
| <b>Chemicals, Peptides, and Recombinant Proteins</b>                                                |                      |                  |
| EZview Red ANTI-FLAG M2 Affinity Gel                                                                | Sigma-Aldrich        | Cat#F2426        |
| Glutathione agarose                                                                                 | Thermo Scientific    | Cat#16100        |
| 60% high-fat diet                                                                                   | Research Diets       | Cat#D12492       |
| Streptozotocin                                                                                      | Sigma-Aldrich        | Cat#S0130        |
| Insulin                                                                                             | Novolin R            | Cat#0169-1833-11 |
| Osteocalcin (OCN) protein                                                                           | Abcam                | Cat#152231       |
| Protein A/G Plus-agarose beads                                                                      | Santa Cruz           | Cat#sc-2003      |
| iScript <sup>TM</sup> cDNA synthesis kit                                                            | Bio-Rad Laboratories | Cat#1708891      |
| iTaq SYBR Green supermix                                                                            | Bio-Rad Laboratories | Cat#1725121      |
| TaqMan <sup>TM</sup> Universal PCR Master Mix                                                       | Thermo Scientific    | Cat#4304437      |
| Insulin solution                                                                                    | Santa Cruz           | Cat# 11061-68-0  |
| Insulin-like Growth Factor-I                                                                        | Sigma-Aldrich        | Cat#I3769        |
| Tamoxifen                                                                                           | Sigma-Aldrich        | Cat#T5648        |
| Osteocalcin shRNA (m) lentiviral Particles                                                          | Santa Cruz           | Cat#sc-40791-V   |
| IGF1R siRNA (m)                                                                                     | Santa Cruz           | Cat#sc-35638     |
| Lipofectamine 2000                                                                                  | Thermo Scientific    | Cat#11668019     |
| Lipofectamine LTX with PLUS                                                                         | Thermo Scientific    | Cat#15338100     |
| Perfusion Medium                                                                                    | Thermo Scientific    | Cat#17701038     |
| Collagenase                                                                                         | Sigma-Aldrich        | Cat#C5168        |
| Collagenase I                                                                                       | Worthington          | Cat#LS004196     |
| Collagenase II                                                                                      | Worthington          | Cat#LS004174     |
| DMEM                                                                                                | Thermo Scientific    | Cat#11965118     |
| William's E Medium                                                                                  | Thermo Scientific    | Cat#12551-032    |
| Wash Medium                                                                                         | Thermo Scientific    | Cat#17704-024    |
| Percoll                                                                                             | GE Healthcare        | Cat#17089101     |
| Penicillin & Streptomycin                                                                           | Thermo Scientific    | Cat#15140122     |
| MCDB131                                                                                             | Sigma-Aldrich        | Cat#M8537        |
| Fetal bovine serum (FBS)                                                                            | Sigma-Aldrich        | Cat#F0926        |
| Horse serum                                                                                         | Thermo Scientific    | Cat#16050114     |
| Hydrocortisone                                                                                      | Sigma-Aldrich        | Cat#H0888        |

|                                                                                                        |                                                                                |                       |
|--------------------------------------------------------------------------------------------------------|--------------------------------------------------------------------------------|-----------------------|
| VEGF165                                                                                                | Sigma-Aldrich                                                                  | Cat#V5765             |
| Maintenance Supplements                                                                                | Thermo Scientific                                                              | Cat#CM4000            |
| Geneticin                                                                                              | Thermo Scientific                                                              | Cat#10131035          |
| Calcein                                                                                                | Sigma-Aldrich                                                                  | Cat#C0875             |
| DSP                                                                                                    | Thermo Scientific                                                              | Cat#22585             |
| <b>Critical Commercial Assays</b>                                                                      |                                                                                |                       |
| Insulin ELISA kit                                                                                      | Millipore                                                                      | Cat#EZRMI-13K         |
| Glucose uptake kit (colorimetric)                                                                      | Abcam                                                                          | Cat#ab136955          |
| Plasma FFA assay kit                                                                                   | WAKO Chemicals                                                                 | Cat#999-34691         |
| Infinity Triglyceride kit                                                                              | Thermo Scientific                                                              | Cat#TR22421           |
| RNA purification kit                                                                                   | QIAGEN                                                                         | Cat#74104             |
| Glucose Uptake-Glo™ Assay Kit                                                                          | Promega                                                                        | Cat#J1341             |
| Infinity Glucose kit                                                                                   | Thermo Scientific                                                              | Cat#TR15421           |
| Human osteocalcin ELISA kit                                                                            | Abcam                                                                          | Cat#AB1952141         |
| Mouse osteocalcin ELISA kit                                                                            | Quidel                                                                         | Cat# 60-1305          |
| Mouse Glu-Osteocalcin High Sensitive EIA Kit                                                           | Takara Bio                                                                     | MK129                 |
| Mouse Glu-Osteocalcin High Sensitive EIA Kit                                                           | Takara Bio                                                                     | MK127                 |
| <b>Experimental Models: Cell Lines</b>                                                                 |                                                                                |                       |
| Primary hepatocytes                                                                                    | This paper                                                                     | N/A                   |
| Primary mouse lung and heart endothelial cells                                                         | This paper                                                                     | N/A                   |
| Primary mouse liver endothelial cells                                                                  | This paper                                                                     | N/A                   |
| Primary mouse lung endothelial cells                                                                   | Cell Biologics                                                                 | Cat#C576011           |
| C2C12                                                                                                  | ATCC                                                                           | Cat#CRL-1772          |
| HEK293 cells                                                                                           | ATCC                                                                           | Cat#CRL-1573          |
| <i>E. coli</i> Lemo21 (DE3)                                                                            | Biolabs                                                                        | Cat#C2528J            |
| <b>Experimental Models: Organisms/Strains</b>                                                          |                                                                                |                       |
| Mouse: B6;129S7- <i>Lrp1</i> <sup>tm2Her/J</sup> (LRP1-floxed; LRP1f/f)                                | Jackson Laboratories                                                           | Cat#012604            |
| Mouse: Cdh5(PAC)-CreERT2 (Cdh5-CreER+)                                                                 | Dr. Ralf H. Adams from Max Planck Institute for Molecular Biomedicine, Germany | N/A                   |
| Mouse: WT C57Bl6/J                                                                                     | Jackson Laboratories                                                           | RRID: IMSR_JAX:000664 |
| Mouse: B6;129- <i>Igf1r</i> <sup>tm2Arge/J</sup> (IGF1R-floxed; IGF1Rf/f)                              | Jackson Laboratories                                                           | Cat#012251            |
| <b>Deposited Data</b>                                                                                  |                                                                                |                       |
| Raw and analyzed RNA sequencing data from ECs isolated from LRP1 eKO and their littermate control mice | This paper                                                                     | GEO: GSE117560        |
| <b>Recombinant DNA</b>                                                                                 |                                                                                |                       |
| pCMV-Tag2 vector-LRP1β                                                                                 | This paper                                                                     | N/A                   |
| pCMV-Tag2 vector                                                                                       | Agilent                                                                        | Cat#211172            |

|                                                                       |                |                                                                     |
|-----------------------------------------------------------------------|----------------|---------------------------------------------------------------------|
| Recombinant adeno-associated virus expressing mouse osteocalcin shRNA | VectorBuilder  | N/A                                                                 |
| pLenti-C-Myc-DDK-OCN                                                  | This paper     | N/A                                                                 |
| pcDNA3 Flag FKHR AAA mutant (CA-FoxO1)                                | Addgene        | Cat#13508                                                           |
| IGF1R-pLX307                                                          | Addgene        | Cat#98344                                                           |
| Ad-CMV-iCre                                                           | Vector Biolabs | Cat#1045                                                            |
| <b>Software and Algorithms</b>                                        |                |                                                                     |
| Graphpad Prism for statistical analysis                               | GraphPad       | N/A                                                                 |
| ImageJ                                                                | NIH            | <a href="https://imagej.nih.gov/ij/">https://imagej.nih.gov/ij/</a> |
| <b>Other</b>                                                          |                |                                                                     |
| MasterFlex pump                                                       | Cole-Parmer    | Cat#Model77122-24                                                   |

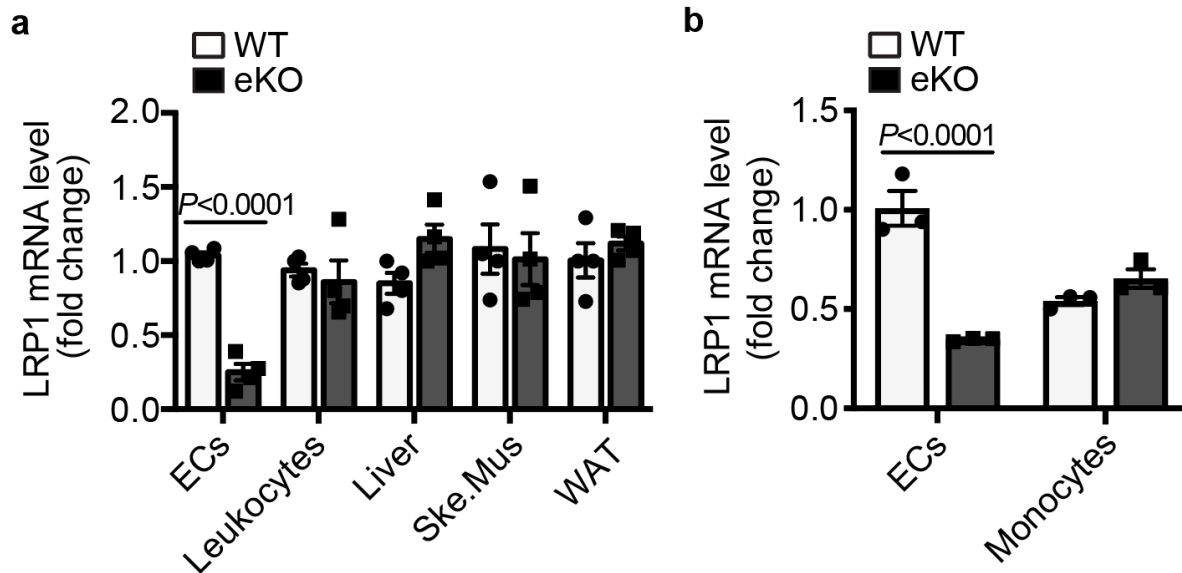

**Supplementary Figure 1. LRP1 is specifically depleted in ECs.** Real-time PCR assays for LRP1 were performed with indicated cells and tissues (**a-b**). eKO,  $LRP1^{f/f}; Cdh5-CreER^{+/-}$ . WT,  $LRP1^{f/f}; Cdh5-CreER^{-/-}$ . EC, endothelial cell. Ske. Mus., skeletal muscle. WAT, white adipose tissue.  $n=4$  (**a**) and 3 (**b**). Data are presented as mean  $\pm$  SEM. Analysis was one-way ANOVA followed by Fisher's LSD multiple comparison test (**a**) or unpaired two-tailed Student's  $t$  test (**b**).

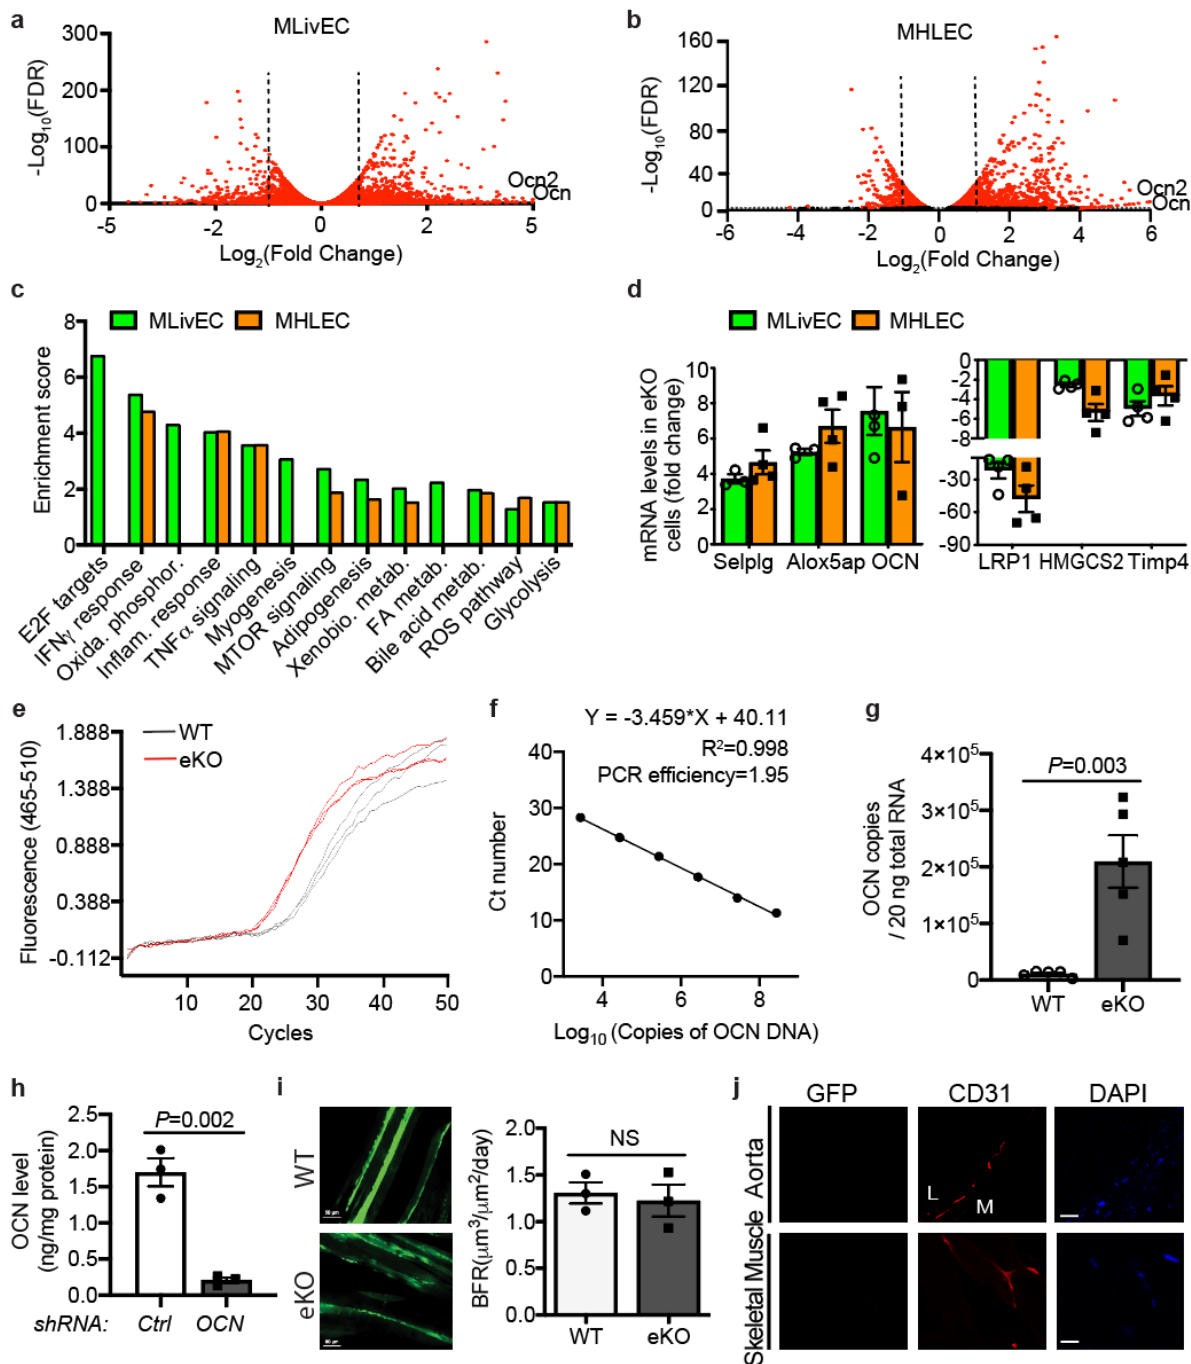

**Supplementary Figure 2. Gene expression profiling analysis, circulating OCN level with LRP1-depleted ECs. (a-b)** Volcano plots of mRNA-seq data for MLivECs (a) and MHLECs (b). (c) Normalized enrichment scores show changes of multiple pathways in LRP1-depleted MLivECs and MHLECs compared to WT ECs. (d) Representative gene expression changes identified in mRNA-seq data, presented as fold changes in LRP1-depleted ECs compared to WT ECs. (e) Representative qPCR amplification curves for OCN in WT and LRP1-depleted MHLECs. (f) The standard curve established between log of OCN DNA copies vs. cycle threshold (Ct)

obtained using 10-fold serial dilution of OCN plasmid DNAs. **(g)** OCN copies in WT and LRP1 eKO MHLECs were calculated based on its standard curve in **(f)**. **(h)** OCN levels was markedly decreased in CM collected from mouse lung ECs transfected with OCN siRNAs, compared to control cells. This data validated our OCN ELISA assays. **(i)** Bone formation rates (BFRs) in LRP1 eKO and WT mice. Bone formation was visualized by double calcein labeling in the vertebrae. scale bar: 50  $\mu$ m. **(j)** Negative control images for Figure 2b. Cross-sections of aorta and skeletal muscle in non-transgenic control mice were stained for GFP (green), CD31 (red) and DAPI (blue). L, lumen. M, media. Scale bar, 20  $\mu$ m. n=3 (**d**, *selplg*, *Alox5ap*, OCN; **h**, **i**), 4 (**d**, LRP1, HMGCS2, *Timp4*), 5 (**g**). NS, not significant. Data are presented as mean  $\pm$  SEM. Analysis was unpaired two-tailed Student's *t* test (**g-i**).

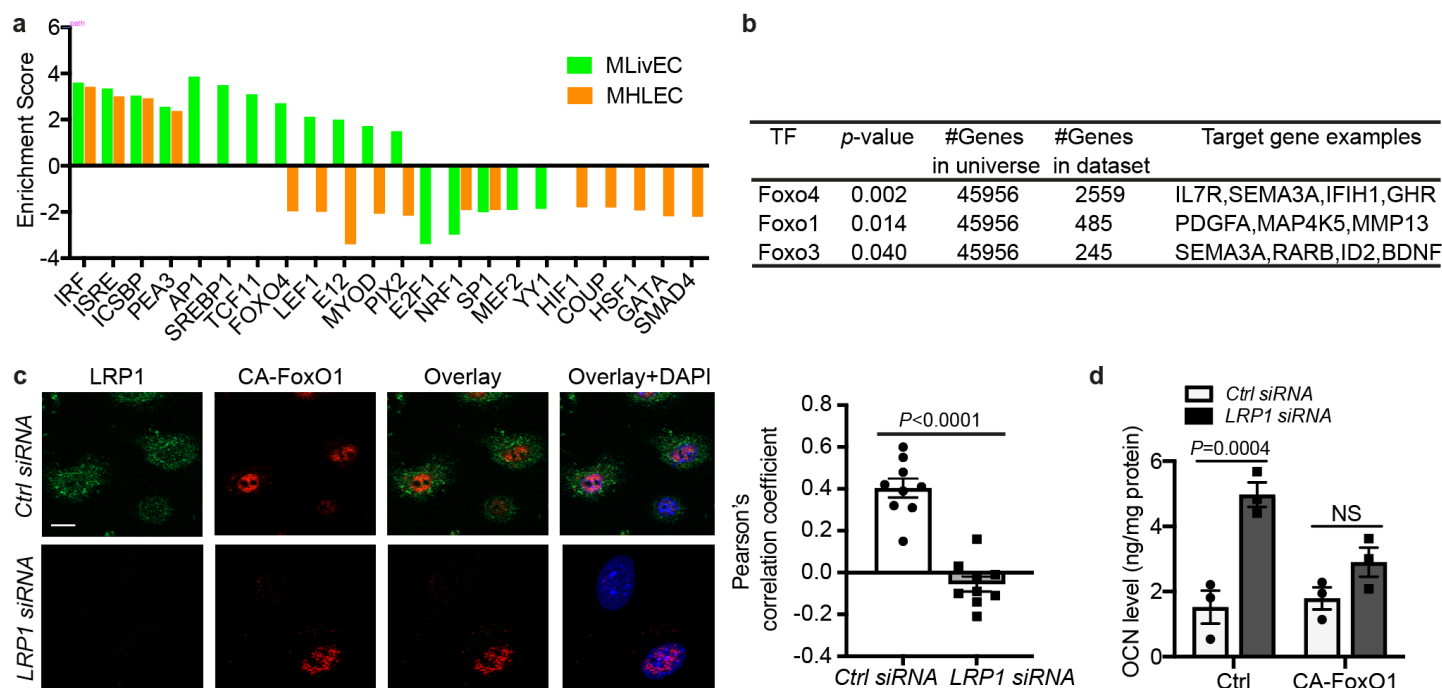

**Supplementary Figure 3. FoxO1 is required for LRP1 depletion-induced OCN in ECs.** (a) Normalized enrichment scores show changes of potential transcriptional factors (TFs) in LRP1-depleted MLivECs and MHLECs compared to WT ECs. (b) GESA analysis indicates that numbers of FoxO-responsive genes that are potentially regulated in LRP1-depleted ECs. (c) The expression and nuclear localization of constitutive active FoxO1 (CA-FoxO1) following the transfection of CA-FoxO1 and LRP1 siRNAs in MVECs. The co-localization of LRP1 and CA-FoxO1 was presented with Pearson's correlation coefficients. scale bar, 10  $\mu$ m. (d) Constitutively active FoxO1 (CA-FoxO1) inhibited LRP1 depletion-induced OCN, analyzed with ELISA.  $n=9$  (c), 3 (d). NS, not significant. Data are presented as mean  $\pm$  SEM. Analysis was unpaired two-tailed Student's *t* test (c) or two-way ANOVA followed by Fisher's LSD multiple comparison test (d).



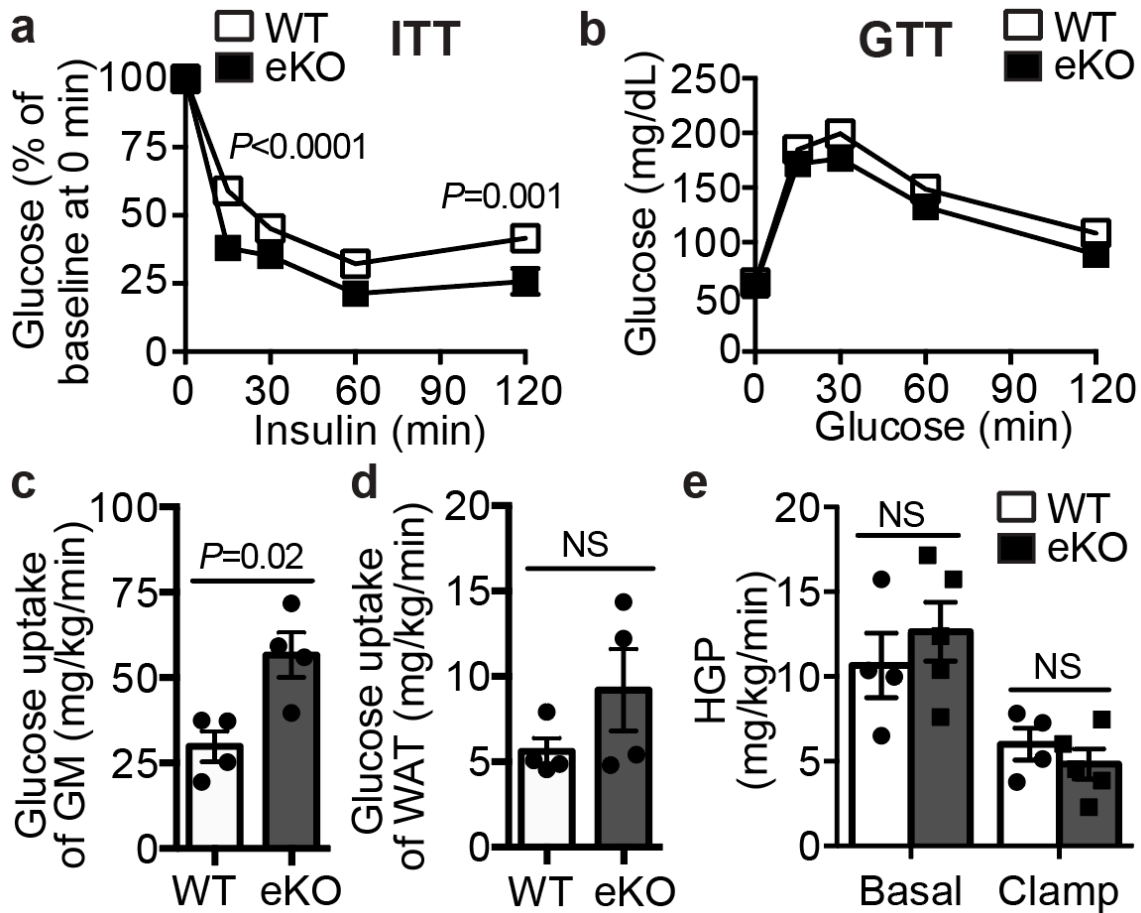

**Supplementary Figure 4. LRP1 eKO mice display increased glucose uptake at physiological condition. (a-b)** Insulin (a) and glucose (b) tolerance tests (ITTs, GTTs). (c-e) Hyperinsulinemic-euglycemic glucose clamp studies were performed in WT and LRP1 eKO mice for measurements of glucose uptake in gastrocnemius muscle (GM, c) and white adipose tissue (WAT, d) and hepatic glucose production (HGP, e). n=7 (a, WT), 6 (a, eKO), 9 (b), 4 (c, d, e, WT), 5 (e, eKO). NS, not significant. Data are presented as mean  $\pm$  SEM. Analysis was two-way ANOVA followed by Fisher's LSD multiple comparison test (a, b, e) or unpaired two-tailed Student's *t* test (c, d).

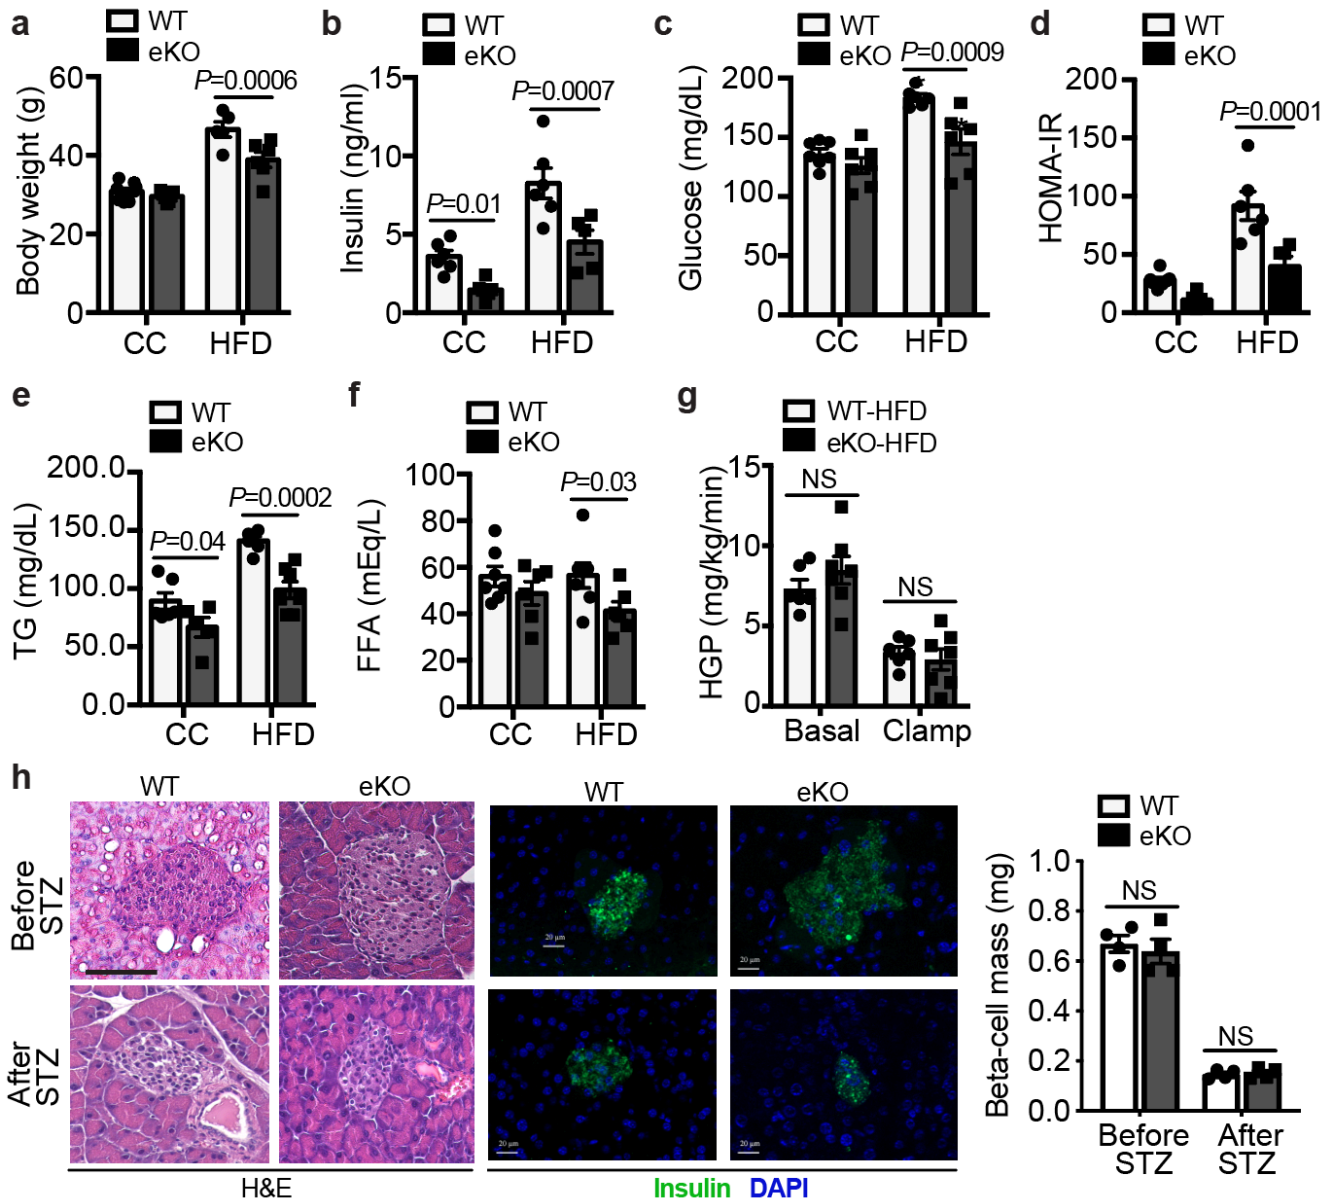

**Supplementary Figure 5. LRP1 eKO mice display improved lipid and glucose responses after HFD feeding.**

(a) Body weight changes upon HFD feeding. CC, control chow. HFD, high-fat diet. (b) Blood insulin levels. (c) Blood glucose levels. (d) HOMA-IR scores. (e) Blood TG levels. (f) Blood FFA levels. (g) Hyperinsulinemic-euglycemic glucose clamp studies were performed in WT and LRP1 eKO mice fed HFD for measurements of hepatic glucose production (HGP). (h) H&E and insulin immunostaining were performed with pancreatic sections of LRP1 eKO and WT mice before and after STZ treatments and beta-cell masses were estimated. Scale bar, 100  $\mu$ m (H&E) and 20  $\mu$ m (insulin images).  $n=7$  (a-d, f, WT), 6 (a-d, f, eKO; e-g, WT), 5 (e-g, eKO), 4 (h). NS, not significant. Data are presented as mean  $\pm$  SEM. Analysis was two-way ANOVA followed by Fisher's LSD multiple comparison test (a-h).

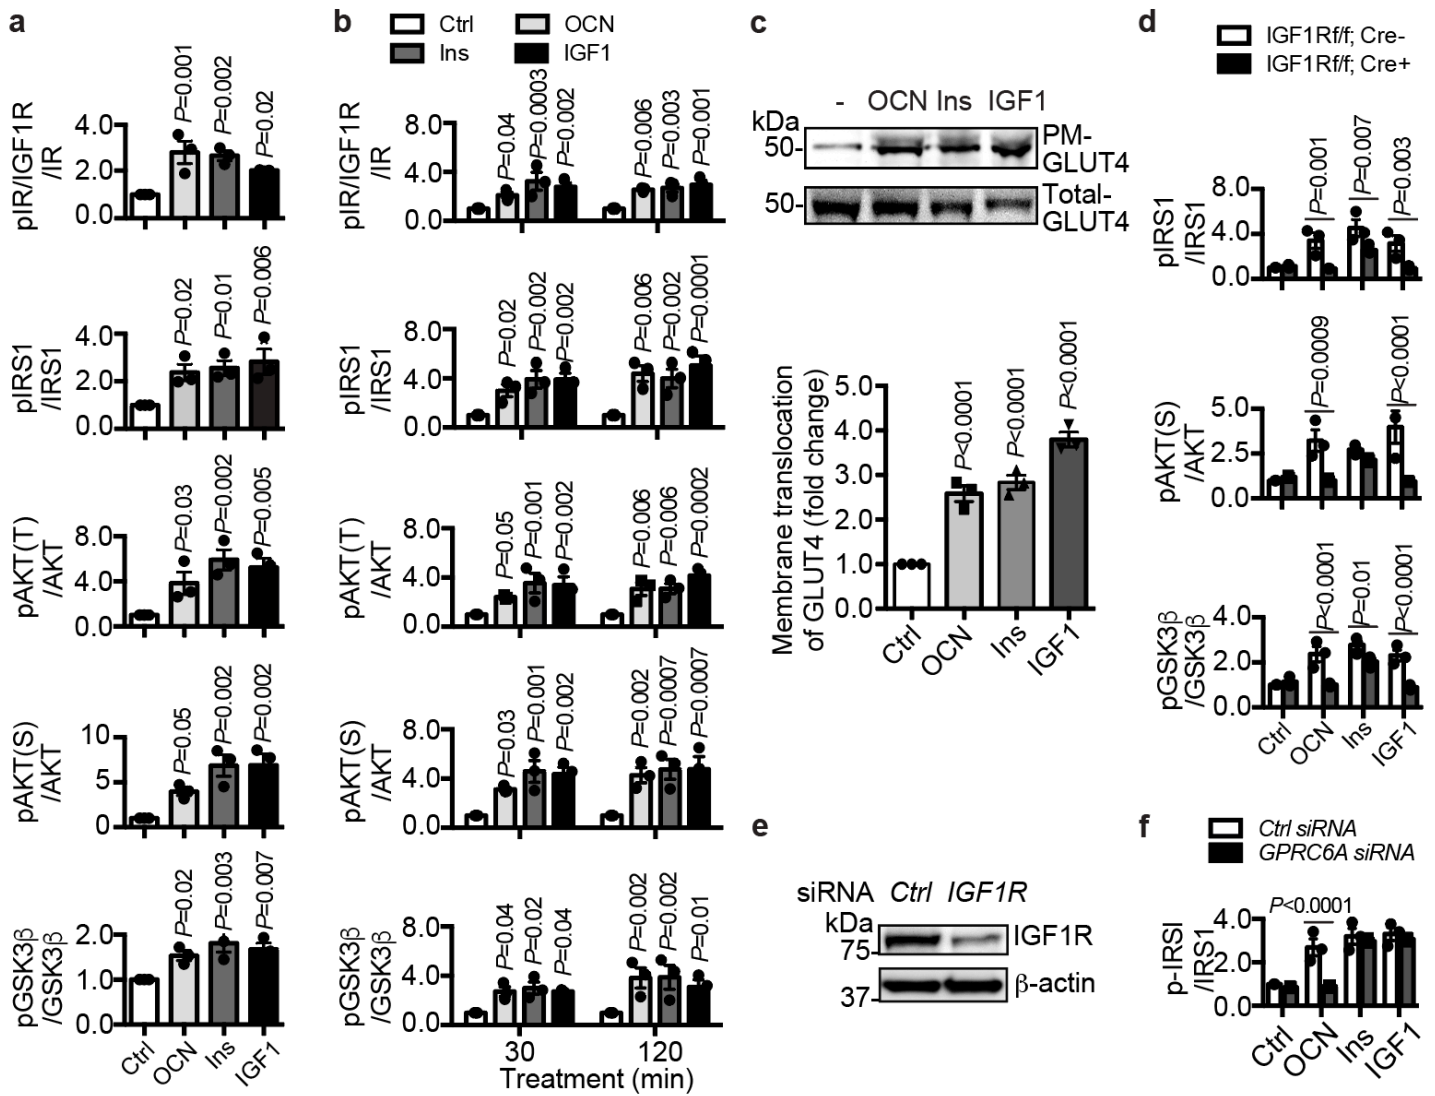

**Supplementary Figure 6. OCN transactivates the insulin signaling pathway.** (a-b) Quantitative results for Figure 5a (a) and 5b (b). (c) OCN increases membrane translocation of GLUT4 in skeletal muscle. (d) Quantitative results for Figure 5h. (e) The knockdown of IGF1R by its siRNAs in C2C12 myoblasts. (f) Quantitative results for Figure 5j. n=3 (a-d, f). Data are presented as mean  $\pm$  SEM. Analysis was one-way ANOVA(a, c) or two-way ANOVA(b, d, f) followed by Fisher's LSD multiple comparison test.
